# Supplementary material for: The universally-conserved transcription factor RfaH is recruited to a hairpin structure of the non-template DNA strand
Source: eLife. 2018 May 9;7:e36349. doi: 10.7554/eLife.36349 (PMC5995543; doi:10.7554/eLife.36349)
Supplement: Figure 2—source data 1. [file elife-36349-fig2-data1.xlsx]

## Sheet: Lux summary
Data from 3 independent sets, 3 biological replicates, 6 technical replicates each.
with RfaH				Average	SD		no RfaH			Average	SD		ops	effect		no RfaH		Average			with RfaH		Average
WT	1	1	1	1	0		1	1	1	1	0		WT	35.8523	329.87	234.032	178.265	247.389		8771.94	9110.01	8726.41	8869.45
G1C	0.408817	0.454431	0.332411	0.398553	0.0616538		0.578809	0.592221	0.557866	0.576299	0.0173144		G1C	24.7722	190.931	138.598	99.4481	142.993		3586.12	4139.87	2900.76	3542.25
G2C	0.315983	0.216488	0.23446	0.255644	0.0530227		0.302145	0.304151	0.201712	0.269336	0.0585727		G2C	32.8324	99.6684	71.181	35.9582	68.9359		2771.79	1972.21	2045.99	2263.33
C3G	0.270995	0.304424	0.247058	0.274159	0.0288135		0.616166	0.658181	0.533376	0.602575	0.0635029		C3G	16.1513	203.254	154.035	95.0824	150.791		2377.16	2773.3	2155.93	2435.46
G4C	0.302655	0.277778	0.325985	0.302139	0.0241074		1.06227	1.20396	0.66183	0.97602	0.281167		G4C	10.7046	350.412	281.764	117.981	250.052		2654.88	2530.56	2844.68	2676.7
G5A	0.173878	0.330512	0.131034	0.211808	0.105009		1.71966	1.74148	1.2445	1.56855	0.280844		G5A	4.7462	567.265	407.561	221.851	398.892		1525.25	3010.97	1143.45	1893.22
T6A	0.546558	0.637361	0.525371	0.569763	0.0594922		2.57659	3.17825	2.57708	2.77731	0.347229		T6A	7.39611	849.938	743.811	459.403	684.384		4794.37	5806.37	4584.6	5061.78
A7T	0.278787	0.315269	0.310991	0.301682	0.0199432		0.598686	0.653757	0.652016	0.63482	0.0313046		A7T	17.2083	197.488	153	116.232	155.573		2445.5	2872.11	2713.83	2677.15
G8C	0.138953	0.118326	0.128395	0.128558	0.0103143		1.11259	0.886305	0.686527	0.89514	0.213167		G8C	4.90412	367.009	207.423	122.384	232.272		1218.89	1077.96	1120.43	1139.09
C9G	0.375906	0.418352	0.323328	0.372529	0.047602		1.61632	1.75475	0.71649	1.36252	0.563743		C9G	9.26691	533.174	410.667	127.725	357.189		3297.43	3811.19	2821.49	3310.04
G10C	0.515482	0.535048	0.504433	0.518321	0.0155036		0.985439	1.26865	0.67606	0.976716	0.296391		G10C	18.5834	325.066	296.904	120.518	247.496		4521.78	4874.29	4401.89	4599.32
T11G	0.149822	0.124272	0.142203	0.138766	0.0131172		1.10384	1.35215	0.480998	0.978995	0.448792		T11G	4.8117	364.124	316.445	85.7452	255.438		1314.23	1132.12	1240.92	1229.09
G12C	0.28857	0.2165	0.248269	0.251113	0.0361192		0.416566	0.513411	0.422504	0.450827	0.0542804		G12C	20.0373	137.413	120.154	75.3178	110.962		2531.32	1972.31	2166.5	2223.38

## Sheet: no R 1
In vivo analysis of ops mutants: no RfaH; trial 1. Three biological replicates, 6 technical replicates
	Tube Nr/Reading	i	ii	iii	iv	v	vi	AVE	OD	AVE/OD	AVE OF 3	SD			Rel to WT
WT	1	418	464	394	436	570	522	467.333	1.394	335.246
	2	396	342	364	390	424	410	387.667	1.274	304.291	329.87	23.3592			1
	3	472	450	478	416	582	530	488	1.394	350.072
G1C	4	286	264	308	216	280	308	277	1.424	194.522
	5	248	272	282	286	282	312	280.333	1.416	197.976	190.931	9.3706			0.578809
	6	200	258	336	260	222	232	251.333	1.394	180.297
G2C	7	114	200	144	132	156	160	151	1.392	108.477
	8	110	140	138	206	142	170	151	1.38	109.42	99.6684	16.0808			0.302145
	9	124	118	96	136	94	88	109.333	1.348	81.1078
C3G	10	278	264	278	362	262	314	293	1.508	194.297
	11	300	274	298	328	268	280	291.333	1.416	205.744	203.254	8.00824			0.616166
	12	286	270	298	308	338	312	302	1.44	209.722
G4C	13	528	522	498	484	600	604	539.333	1.366	394.827
	14	382	522	542	534	432	436	474.667	1.354	350.566	350.412	44.4926			1.06227
	15	340	466	422	450	416	398	415.333	1.358	305.842
G5A	16	724	606	638	666	730	786	691.667	1.288	537.008
	17	800	786	816	738	770	856	794.333	1.332	596.346	567.265	41.1954			1.71966
	18	656	728	736	890	732	876	769.667	1.354	568.439
T6A	19	1252	1342	1362	1290	1264	1332	1307	1.484	880.728
	20	1042	1052	1224	1166	1218	1214	1152.67	1.37	841.363	849.938	27.5231			2.57659
	21	1114	1166	1188	1094	1244	1276	1180.33	1.426	827.723
A7T	22	288	216	332	284	328	358	301	1.464	205.601
	23	266	174	384	338	278	332	295.333	1.5	196.889	197.488	7.83016			0.598686
	24	294	278	254	388	344	284	307	1.616	189.975
G8C	25	438	364	380	414	498	360	409	1.338	305.68
	26	512	482	486	546	600	616	540.333	1.38	391.546	367.009	53.4643			1.11259
	27	544	568	636	504	548	558	559.667	1.386	403.8
C9G	28	544	596	694	592	616	776	636.333	1.264	503.428
	29	660	664	872	752	786	768	750.333	1.386	541.366	533.174	26.6122			1.61632
	30	680	776	804	700	746	754	743.333	1.34	554.726
G10C	31	388	448	454	436	452	422	433.333	1.39	311.751
	32	440	470	504	528	554	422	486.333	1.38	352.415	325.066	23.6878			0.985439
	33	474	460	388	456	426	446	441.667	1.42	311.033
T11G	34	600	594	636	634	530	600	599	1.474	406.377
	35	510	472	542	498	590	504	519.333	1.488	349.014	364.124	37.0834			1.10384
	36	494	428	470	548	414	602	492.667	1.462	336.981
G12C	37	202	198	192	218	248	192	208.333	1.544	134.931
	38	198	208	212	218	196	184	202.667	1.51	134.216	137.413	4.93022			0.416566
	39	232	168	148	242	250	186	204.333	1.428	143.091

## Sheet: no R 2
In vivo analysis of ops mutants: no RfaH; trial 2. Three biological replicates, 6 technical replicates.
	Tube Nr/Reading	i	ii	iii	iv	v	vi	AVE	OD	AVE/OD	AVE OF 3	SD			Rel to WT
WT	1	320	300	328	308	342	274	312	1.39	224.46
	2	318	292	314	284	398	328	322.333	1.384	232.9	234.032	10.1843			1
	3	350	382	352	408	316	330	356.333	1.456	244.734
G1C	4	208	210	206	184	284	240	222	1.672	132.775
	5	222	152	190	154	218	168	184	1.372	134.111	138.598	8.95437			0.592221
	6	248	150	216	234	156	170	195.667	1.314	148.909
G2C	7	70	104	118	128	110	124	109	1.424	76.5449
	8	18	132	90	128	128	110	101	1.49	67.7852	71.181	4.6998			0.304151
	9	88	78	88	88	122	134	99.6667	1.44	69.213
C3G	10	166	176	190	170	206	246	192.333	1.382	139.17
	11	236	270	244	288	174	206	236.333	1.404	168.329	154.035	14.5876			0.658181
	12	212	158	222	186	282	222	213.667	1.382	154.607
G4C	13	424	328	418	426	422	390	401.333	1.364	294.233
	14	344	336	388	354	320	410	358.667	1.408	254.735	281.764	23.4309			1.20396
	15	344	418	446	420	352	470	408.333	1.378	296.323
G5A	16	540	502	508	602	574	680	567.667	1.392	407.807
	17	458	442	520	592	494	590	516	1.312	393.293	407.561	44.5242			1.74148
	18	496	530	542	588	634	726	586	1.39	421.583
T6A	19	836	940	936	800	964	1006	913.667	1.362	670.827
	20	932	960	1092	1144	1084	1026	1039.67	1.358	765.587	743.811	64.8964			3.17825
	21	908	1128	1056	1134	1214	1200	1106.67	1.392	795.019
A7T	22	176	172	228	208	288	222	215.667	1.362	158.346
	23	164	146	232	296	154	276	211.333	1.39	152.038	153	4.93589			0.653757
	24	226	150	244	166	246	170	200.333	1.348	148.615
G8C	25	214	278	230	248	262	262	249	1.294	192.427
	26	252	226	274	370	316	286	287.333	1.292	222.394	207.423	14.9838			0.886305
	27	258	302	284	308	278	330	293.333	1.414	207.449
C9G	28	500	496	328	406	538	528	466	1.326	351.433
	29	574	592	614	594	614	578	594.333	1.358	437.653	410.667	51.3659			1.75475
	30	534	568	538	614	664	558	579.333	1.308	442.915
G10C	31	394	420	510	490	500	564	479.667	1.694	283.156
	32	438	394	446	324	366	444	402	1.416	283.898	296.904	23.1722			1.26865
	33	466	402	464	460	460	424	446	1.378	323.657
T11G	34	446	478	514	540	538	506	503.667	1.442	349.283
	35	434	482	450	410	452	416	440.667	1.42	310.329	316.445	30.2481			1.35215
	36	414	468	444	338	464	330	409.667	1.414	289.722
G12C	37	138	124	146	178	204	192	163.667	1.52	107.675
	38	212	170	224	178	242	150	196	1.446	135.546	120.154	14.162			0.513411
	39	144	182	176	174	158	186	170	1.45	117.241

## Sheet: no R 3
In vivo analysis of ops mutants: no RfaH; trial 3. Three biological replicates, 6 technical replicates.
	Tube Nr/Reading	i	ii	iii	iv	v	vi	AVE	OD	AVE/OD	AVE OF 3	SD			Rel to WT
WT		226	146	232	210	234	252	216.667	1.29	167.959
		172	250	220	208	286	304	240	1.242	193.237	178.265	13.269			1
		260	258	216	220	140	208	217	1.25	173.6
G1C		104	92	134	90	132	178	121.667	1.384	87.9094
		214	186	244	156	130	214	190.667	1.51	126.269	99.4481	23.3032			0.557866
		108	74	110	84	162	170	118	1.402	84.1655
G2C		38	46	48	42	74	66	52.3333	1.412	37.0633
		0	16	42	76	52	58	40.6667	1.304	31.1861	35.9582	4.32679			0.201712
		30	12	58	102	68	60	55	1.388	39.6254
C3G		176	130	100	120	164	82	128.667	1.422	90.4829
		124	170	152	172	92	128	139.667	1.364	102.395	95.0824	6.40267			0.533376
		126	144	108	144	94	120	122.667	1.328	92.3695
G4C		134	190	210	176	124	174	168	1.39	120.863
		160	152	118	174	130	126	143.333	1.366	104.929	117.981	11.8762			0.66183
		160	166	192	204	178	198	183	1.428	128.151
G5A		276	218	268	244	314	286	267.667	1.332	200.951
		222	332	360	300	288	270	295.333	1.232	239.719	221.851	29.0401			1.2445
		230	264	336	264	302	350	291	1.294	224.884
T6A		516	538	642	662	592	676	604.333	1.258	480.392
		456	496	664	614	530	558	553	1.242	445.25	459.403	18.5416			2.57708
		544	442	632	564	624	648	575.667	1.272	452.568
A7T		106	88	190	132	120	134	128.333	1.234	103.998
		162	90	120	166	206	182	154.333	1.29	119.638	116.232	10.9361			0.652016
		160	216	146	176	174	186	176.333	1.41	125.059
G8C		144	146	192	170	178	202	172	1.292	133.127
		136	130	192	142	194	140	155.667	1.232	126.353	122.384	13.1834			0.686527
		116	152	180	64	148	154	135.667	1.26	107.672
C9G		90	140	194	152	136	194	151	1.194	126.466
		188	222	200	256	242	234	223.667	1.518	147.343	127.725	19.0194			0.71649
		116	142	140	108	154	176	139.333	1.274	109.367
G10C		234	156	174	148	120	170	167	1.428	116.947
		170	142	224	182	222	204	190.667	1.492	127.793	120.518	6.3004			0.67606
		176	278	224	164	122	142	184.333	1.578	116.815
T11G		62	84	96	112	98	86	89.6667	1.22	73.4973
		116	114	164	88	120	124	121	1.388	87.1758	85.7452	11.599			0.480998
		126	130	150	162	146	140	142.333	1.474	96.5626
G12C		70	66	88	114	120	80	89.6667	1.404	63.8651
		52	168	102	140	136	76	112.333	1.326	84.7159	75.3178	10.5761			0.422504
		134	80	68	102	128	124	106	1.37	77.3723

## Sheet: +R 1
In vivo analysis of ops mutants: + RfaH; trial 1. Three biological replicates, 6 technical replicates.
	Tube Nr/Reading	i	ii	iii	iv	v	vi	AVE	OD	AVE/OD	AVE OF 3	SD	relative to WT
WT	1	9866	9468	10086	10130	10428	10332	10051.7	1.226	8198.75
	2	11532	11308	12144	12502	12062	12276	11970.7	1.308	9151.89	8771.94	505.098	1
	3	10814	11068	12362	12480	11760	11552	11672.7	1.302	8965.18
G1C	4	3360	3466	3698	3882	3894	3962	3710.33	1.078	3441.87
	5	3110	3158	3440	3190	3476	3526	3316.67	1.014	3270.87	3586.12	407.012	0.408817
	6	3830	3696	4268	4088	4098	4148	4021.33	0.994	4045.61
G2C	7	3770	3674	4192	3984	3978	4124	3953.67	1.354	2919.99
	8	3374	3374	3706	3788	3588	3614	3574	1.312	2724.09	2771.79	131.036	0.315983
	9	3286	3180	3572	3962	3324	3512	3472.67	1.3	2671.28
C3G	10	2766	2814	2688	2790	2992	2962	2835.33	1.036	2736.81
	11	2228	2092	2120	2168	2280	2454	2223.67	1.064	2089.91	2377.16	329.471	0.270995
	12	2484	2612	2376	2536	2570	2578	2526	1.096	2304.74
G4C	13	3064	2860	3556	3340	3208	3360	3231.33	1.352	2390.04
	14	3248	2926	3466	3604	3336	3558	3356.33	1.352	2482.5	2654.88	381.452	0.302655
	15	3898	3850	4240	4398	3912	4414	4118.67	1.332	3092.09
G5A	16	1594	1524	1614	1690	1800	1666	1648	1.482	1112.01
	17	1720	1830	1892	1944	1970	1978	1889	1.41	1339.72	1525.25	713.187	0.173878
	18	3472	3248	3362	3730	3224	3380	3402.67	1.602	2124.01
T6A	19	5052	5192	5150	5108	5458	5526	5247.67	1.278	4106.16
	20	8040	8274	8880	8504	7350	7824	8145.33	1.482	5496.18	4794.37	695.11	0.546558
	21	7090	6894	7000	7006	7160	7246	7066	1.478	4780.78
A7T	22	2014	2064	2056	2072	2000	2108	2052.33	1.298	1581.15
	23	3680	3432	3830	3788	3644	3454	3638	1.322	2751.89	2445.5	759.043	0.278787
	24	4378	4110	4580	4360	4428	4202	4343	1.446	3003.46
G8C	25	1450	1256	1404	1476	1324	1460	1395	1.406	992.176
	26	1422	1240	1508	1424	1290	1418	1383.67	1.378	1004.11	1218.89	382.387	0.138953
	27	2396	2382	2664	2480	2468	2394	2464	1.484	1660.38
C9G	28	3040	3162	3542	3744	3448	3676	3435.33	1.082	3174.98
	29	3334	3274	3378	3742	3730	3554	3502	1.008	3474.21	3297.43	156.836	0.375906
	30	3462	3462	3368	3510	3666	3664	3522	1.086	3243.09
G10C	31	4568	4172	4812	4634	4716	4794	4616	1.008	4579.37
	32	4800	4524	5034	4556	4874	4686	4745.67	1.032	4598.51	4521.78	116.718	0.515482
	33	4186	4240	4510	4760	4586	4306	4431.33	1.01	4387.46
T11G	34	1684	1510	2044	1990	1900	1866	1832.33	1.474	1243.1
	35	1480	1744	1666	1680	1542	1678	1631.67	1.434	1137.84	1314.23	220.726	0.149822
	36	2028	2160	2426	2484	2204	2304	2267.67	1.452	1561.75
G12C	37	3000	2764	3136	3322	3026	3122	3061.67	1.314	2330.04
	38	3284	3136	3568	3896	3606	3620	3518.33	1.286	2735.87	2531.32	202.939	0.28857
	39	2932	2942	3182	3396	3282	3378	3185.33	1.26	2528.04

## Sheet: +R 2
In vivo analysis of ops mutants: + RfaH; trial 2. Three biological replicates, 6 technical replicates.
	Tube Nr/Reading	i	ii	iii	iv	v	vi	AVE	OD	AVE/OD	AVE OF 3	SD			Rel. to WT
WT	1	13715	10465	14426	14249	14681	14470	13667.7	1.586	8617.7
	2	13141	12407	12923	13376	13270	13512	13104.8	1.572	8336.41	9110.01	1105.3			1
	3	16265	15280	16368	16048	15348	15195	15750.7	1.518	10375.9
G1C	4	4214	4208	4300	4258	4616	4266	4310.33	1.09	3954.43
	5	4268	4082	4404	4812	4522	4584	4445.33	1.014	4383.96	4139.87	220.687			0.454431
	6	4104	3976	4056	4048	4464	4378	4171	1.022	4081.21
G2C	7	3036	3468	3577	3278	3182	3441	3330.33	1.506	2211.38
	8	2856	2533	3152	2805	2662	2836	2807.33	1.474	1904.57	1972.21	213.543			0.216488
	9	2638	2638	2693	3067	2768	2791	2765.83	1.536	1800.67
C3G	10	3140	3116	3252	3394	3536	3362	3300	1.086	3038.67
	11	2720	2458	2732	2722	3008	3090	2788.33	1.012	2755.27	2773.3	256.829			0.304424
	12	2548	2626	3048	2856	3004	2650	2788.67	1.104	2525.97
G4C	13	2672	2696	2693	3016	3101	3383	2926.83	1.468	1993.76
	14	3406	3519	3896	3641	3679	3941	3680.33	1.424	2584.5	2530.56	511.971			0.277778
	15	3937	3794	4009	4267	4141	4767	4152.5	1.378	3013.43
G5A	16	4175	4400	4760	4672	5358	5182	4757.83	1.346	3534.79
	17	3464	4087	4321	4022	4699	4566	4193.17	1.458	2875.97	3010.97	1178.15			0.330512
	18	3529	3407	4335	3781	4107	3811	3828.33	1.46	2622.15
T6A	19	6630	6698	7239	7548	7449	7208	7128.67	1.392	5121.17
	20	8401	8639	8694	8687	9156	8816	8732.17	1.442	6055.59	5806.37	600.701			0.637361
	21	8687	8952	9394	9047	9017	8687	8964	1.436	6242.34
A7T	22	4179	4546	4723	4505	4590	4559	4517	1.452	3110.88
	23	4209	4155	4233	4383	3934	4352	4211	1.48	2845.27	2872.11	226.552			0.315269
	24	3696	3465	3594	3774	4202	4189	3820	1.436	2660.17
G8C	25	2149	2040	2003	2190	2013	2407	2133.67	1.68	1270.04
	26	1408	1554	1897	1554	1724	1822	1659.83	1.594	1041.3	1077.96	176.632			0.118326
	27	1299	1309	1136	1530	1414	1183	1311.83	1.422	922.527
C9G	28	3044	3172	3474	3534	3438	3544	3367.67	0.964	3493.43
	29	4030	3850	4344	4332	4072	4104	4122	1.04	3963.46	3811.19	275.268			0.418352
	30	3868	3722	3848	3868	3846	4040	3865.33	0.972	3976.68
G10C	31	4984	5150	5192	4982	5162	5382	5142	1.072	4796.64
	32	5554	5150	5546	5446	5228	5130	5342.33	1.106	4830.32	4874.29	106.669			0.535048
	33	5322	5576	5492	5258	5100	5086	5305.67	1.062	4995.92
T11G	34	1785	1561	2013	1826	2030	1962	1862.83	1.484	1255.28
	35	1629	1268	1669	1754	1775	1714	1634.83	1.452	1125.92	1132.12	120.174			0.124272
	36	1357	1272	1537	1503	1758	1673	1516.67	1.494	1015.17
G12C	37	2492	2618	3227	2948	2870	3298	2908.83	1.486	1957.49
	38	2244	2244	2533	2788	2754	2373	2489.33	1.496	1663.99	1972.31	315.992			0.2165
	39	3325	3165	3318	3349	3182	3356	3282.5	1.43	2295.45

## Sheet: +R 3
In vivo analysis of ops mutants: + RfaH; trial 3. Three biological replicates, 6 technical replicates.
	Tube Nr/Reading	i	ii	iii	iv	v	vi	AVE	OD	AVE/OD	AVE OF 3	SD			Rel. to WT
WT	1	12876	13454	13403	13284	14175	13773	13494.2	1.55	8705.91
	2	11081	10788	12386	12274	12849	12645	12003.8	1.44	8336	8726.41	401.056			1
	3	12318	12291	12978	14039	14260	13828	13285.7	1.454	9137.32
G1C	4	3088	3220	3298	3462	3664	3400	3355.33	1.216	2759.32
	5	3644	3718	3986	3744	4074	4234	3900	1.24	3145.16	2900.76	212.532			0.332411
	6	3024	2902	3142	3092	3278	3296	3122.33	1.116	2797.79
G2C	7	3261	3400	3070	3278	3383	3284	3279.33	1.426	2299.67
	8	2179	1999	2176	2200	2370	2434	2226.33	1.496	1488.19	2045.99	483.729			0.23446
	9	3536	3108	3220	3461	3278	3420	3337.17	1.42	2350.12
C3G	10	2336	2116	2374	2354	2174	2266	2270	1.196	1897.99
	11	2500	2362	2410	2606	2542	2432	2475.33	1.158	2137.59	2155.93	267.572			0.247058
	12	3186	3014	3154	2942	3274	3226	3132.67	1.288	2432.19
G4C	13	3740	3794	3747	4128	4114	4366	3981.5	1.462	2723.32
	14	3706	4294	4134	4532	4593	4165	4237.33	1.416	2992.47	2844.68	136.506			0.325985
	15	3992	3951	3985	4104	4230	4189	4075.17	1.446	2818.23
G5A	16	1537	1350	1533	1618	1431	1649	1519.67	1.5	1013.11
	17	1894	2084	2417	1710	2288	2363	2126	1.66	1280.72	1143.45	661.019			0.131034
	18	1863	1595	2026	1904	1714	1795	1816.17	1.598	1136.52
T6A	19	6222	5579	5777	6293	6287	6450	6101.33	1.38	4421.26
	20	6654	6946	7687	7568	7286	7521	7277	1.516	4800.13	4584.6	194.755			0.525371
	21	6633	6324	6446	6620	6691	6718	6572	1.45	4532.41
A7T	22	3240	3176	3675	3454	3516	3828	3481.5	1.378	2526.49
	23	4145	4148	4740	4716	4750	4719	4536.33	1.54	2945.67	2713.83	213.104			0.310991
	24	3590	3720	4141	4073	4325	4111	3993.33	1.496	2669.34
G8C	25	1680	1516	1707	1680	1744	1819	1691	1.4	1207.86
	26	1707	1496	1850	1680	1618	1758	1684.83	1.5	1123.22	1120.43	88.8617			0.128395
	27	1482	1503	1540	1751	1394	1404	1512.33	1.468	1030.2
C9G	28	2628	2672	2744	3044	3070	2934	2848.67	1.186	2401.91
	29	3124	2758	3062	3000	3020	3158	3020.33	1.016	2972.77	2821.49	368.048			0.323328
	30	3146	3270	3212	3150	3186	3168	3188.67	1.032	3089.79
G10C	31	4712	4778	5084	5056	5204	5418	5042	1.178	4280.14
	32	5842	6078	6690	6188	6288	6208	6215.67	1.282	4848.41	4401.89	399.803			0.504433
	33	4482	4860	4870	4868	4964	4822	4811	1.18	4077.12
T11G	34	1741	1533	1785	1714	1972	1615	1726.67	1.516	1138.96
	35	2390	2815	2434	2377	2645	2506	2527.83	1.65	1532.02	1240.92	255.841			0.142203
	36	1493	1717	1659	1632	1326	1639	1577.67	1.5	1051.78
G12C	37	3087	2693	3240	3322	3342	3322	3167.67	1.454	2178.59
	38	3216	3186	3621	3699	3244	3267	3372.17	1.466	2300.25	2166.5	140.188			0.248269
	39	2591	2594	3002	2890	2873	3169	2853.17	1.412	2020.66
