# Supplementary material for: The universally-conserved transcription factor RfaH is recruited to a hairpin structure of the non-template DNA strand
Source: eLife. 2018 May 9;7:e36349. doi: 10.7554/eLife.36349 (PMC5995543; doi:10.7554/eLife.36349)
Supplement: Figure 2—source data 2. [file elife-36349-fig2-data2.xlsx]

## Sheet: U11
In vitro analysis of ops mutants
Summary: U11 RNA fraction at 20 sec chase
ops variant	Trial 1	Trial 2	Trial 3	Avg	Std dev	‒/+ RfaH
WT - RfaH	10.1678	11.45	12.37	11.3293	1.10604	4.21924
WT + RfaH	2.24544	3.03	2.78	2.68515	0.400788
G1C - RfaH	5.38975	4.4107	2.79906	4.19984	1.30815	3.7802
G1C + RfaH	1.38962	0.99077	0.952638	1.11101	0.242039
G2C - RfaH	8.19156	6.55454	4.99089	6.579	1.60048	4.96785
G2C + RfaH	1.68488	1.38694	0.901126	1.32431	0.395613
C3G - RfaH	7.60589	10.9648	9.87821	9.48298	1.714	1.26558
C3G + RfaH	6.40186	8.80883	7.26834	7.49301	1.21912
G4C - RfaH	7.95542	9.98815	8.31395	8.75251	1.08501	0.907856
G4C + RfaH	9.83328	10.4472	8.6421	9.64085	0.917795
G5A - RfaH	8.02171	9.07138	6.86291	7.98533	1.10469	1.00767
G5A + RfaH	8.99443	8.9037	5.87547	7.92453	1.77512
T6A - RfaH	11.9882	15.463	11.997	13.1494	2.00367	1.40125
T6A + RfaH	6.7937	11.1285	10.23	9.38407	2.28787
A7T - RfaH	4.20578	5.10588	5.29467	4.86878	0.581877	0.963733
A7T + RfaH	4.74097	4.886	5.52902	5.052	0.419431
G8C - RfaH	13.5311	19.0549	17.966	16.8507	2.92588	1.04612
G8C + RfaH	12.708	19.4634	16.1518	16.1077	3.37793
C9G - RfaH	4.34642	5.29945	4.1721	4.60599	0.606845	7.02789
C9G + RfaH	0.711981	0.662344	0.591838	0.655388	0.0603731
G10C - RfaH	14.0312	16.6219	17.26	15.971	1.70998	1.56623
G10C + RfaH	8.05445	10.0069	12.53	10.1971	2.24383
T11G - RfaH	2.0826	3.00644	2.53268	2.54057	0.461971	2.13922
T11G + RfaH	1.00937	1.3038	1.24969	1.18762	0.156723
G12C - RfaH	0.539131	0.505031	0.601158	0.54844	0.0487346	1.13659
G12C + RfaH	0.42232	0.459083	0.566192	0.482532	0.0747476

## Sheet: G12+C13
In vitro analysis of ops mutants
Summary: G12+C13 RNA fractions at 20 sec chase
ops variant	Trial 1	Trial 2	Trial 3	Avg	Std dev	⁺/- RfaH
WT - RfaH	1.65154	1.77	2.02	1.81385	0.188102	5.83499
WT + RfaH	10.8676	10.3	10.68	10.6159	0.289167
G1C - RfaH	3.46226	3.252	1.70529	2.80652	0.959466	1.76414
G1C + RfaH	6.22632	5.70799	2.91895	4.95109	1.77886
G2C - RfaH	1.80406	1.56957	1.00262	1.45875	0.412053	1.92814
G2C + RfaH	3.59889	2.82019	2.01893	2.81267	0.790006
C3G - RfaH	3.0069	4.40606	4.87646	4.09648	0.972469	1.32408
C3G + RfaH	4.30419	5.95062	6.0174	5.42407	0.97042
G4C - RfaH	1.75696	2.48568	1.73121	1.99128	0.428354	1.13943
G4C + RfaH	2.10551	2.66015	2.04115	2.26894	0.340326
G5A - RfaH	1.70858	2.22382	1.3478	1.76007	0.440275	1.12237
G5A + RfaH	2.16372	2.37217	1.39047	1.97546	0.517218
T6A - RfaH	2.56171	3.78853	3.6	3.31674	0.660641	1.8914
T6A + RfaH	5.81223	7.4076	5.6	6.27328	0.988068
A7T - RfaH	1.63641	0.837752	1.39497	1.28971	0.409604	1.04154
A7T + RfaH	1.66908	0.964342	1.39644	1.34329	0.355365
G8C - RfaH	2.81104	3.79086	3.29268	3.29819	0.489933	0.981987
G8C + RfaH	2.85073	3.52059	3.34503	3.23878	0.347336
C9G - RfaH	3.13336	3.39415	3.25532	3.26094	0.130485	1.87009
C9G + RfaH	5.13976	6.6173	6.53769	6.09825	0.831033
G10C - RfaH	3.55873	3.81544	3.45	3.60806	0.187646	2.14184
G10C + RfaH	6.5238	8.25981	8.4	7.72787	1.04511
T11G - RfaH	1.19656	1.45072	1.51721	1.38817	0.169229	1.77885
T11G + RfaH	2.17572	2.39608	2.83623	2.46934	0.336299
G12C - RfaH	1.41641	1.32973	1.8112	1.51912	0.256641	3.42996
G12C + RfaH	5.86686	4.45695	5.3077	5.2105	0.709963

## Sheet: in vitro 1
In vitro analysis of ops mutants: Trial 1
WT	Time (s)	T11	G12+C13	Total	T11, %	G12/C13, %
no RfaH	10	2.04472e+06	360531	2.98261e+07	6.85548	1.20878
	20	3.25283e+06	528351	3.19914e+07	10.1678	1.65154
	40	2.15618e+06	567997	2.9592e+07	7.28637	1.91943
	80	1.13216e+06	480628	2.96162e+07	3.82277	1.62285
	160	580950	367241	2.99518e+07	1.93962	1.22611
	320	349485	238734	2.87252e+07	1.21665	0.831096
	640	256769	167939	2.99323e+07	0.857831	0.561064
	1280	179643	118736	2.826e+07	0.635679	0.420156
with RfaH	10	836265	1.14373e+06	25383650	3.2945	4.50576
	20	551176	2.6676e+06	2.45465e+07	2.24544	10.8676
	40	294976	2.7306e+06	2.69235e+07	1.0956	10.142
	80	162478	1.39547e+06	2.74164e+07	0.592633	5.08992
	160	112530	652729	2.70547e+07	0.415934	2.41262
	320	91034.8	466798	2.71796e+07	0.334938	1.71746
	640	97532	394461	2.89769e+07	0.336586	1.3613
	1280	90090.6	284370	2.53248e+07	0.35574	1.12289
G1C	Time (s)	T11	G12+C13	Total	T11, %	G12/C13, %
no RfaH	10	821773	412322	2.56429e+07	3.20468	1.60794
	20	1.30638e+06	839193	2.42383e+07	5.38975	3.46226
	40	1.01171e+06	950032	2.61397e+07	3.87042	3.63445
	80	338333	598163	2.30724e+07	1.4664	2.59255
	160	175408	488207	2.50222e+07	0.70101	1.9511
	320	122042	378660	2.37619e+07	0.513603	1.59356
	640	104956	374583	2.54684e+07	0.412102	1.47077
	1280	85669.2	343011	2.45585e+07	0.348838	1.39671
with RfaH	10	247610	645757	2.39642e+07	1.03325	2.69468
	20	344237	1.54238e+06	2.4772e+07	1.38962	6.22632
	40	130417	778732	1.83001e+07	0.712659	4.25535
	80	89262.2	1.18502e+06	2.35878e+07	0.378426	5.02389
	160	67102.7	703928	2.46483e+07	0.27224	2.85588
	320	76833.7	493360	2.39926e+07	0.32024	2.0563
	640	90336	388364	2.54935e+07	0.354349	1.52338
	1280	116490	341979	2.37903e+07	0.489653	1.43747
G2C	Time (s)	T11	G12+C13	Total	T11, %	G12/C13, %
no RfaH	10	859305	250122	2.28733e+07	3.75681	1.09351
	20	2.01436e+06	443630	2.45907e+07	8.19156	1.80406
	40	2.58703e+06	513473	2.47731e+07	10.4429	2.0727
	80	1.68291e+06	527088	2.28945e+07	7.35073	2.30225
	160	730523	542854	2.41199e+07	3.02872	2.25065
	320	405991	515838	2.61779e+07	1.55089	1.97051
	640	245748	386700	2.59159e+07	0.948252	1.49213
	1280	158756	304455	2.57572e+07	0.616356	1.18202
with RfaH	10	312329	468970	2.3241e+07	1.34387	2.01785
	20	423202	903953	2.51176e+07	1.68488	3.59889
	40	354651	1.06679e+06	2.69819e+07	1.3144	3.95371
	80	235993	1.04892e+06	2.60238e+07	0.906834	4.03061
	160	156626	986258	2.59513e+07	0.603539	3.80042
	320	111099	815059	2.61842e+07	0.424297	3.11279
	640	90520.5	605597	2.5616e+07	0.353374	2.36413
	1280	69659.1	381555	2.47373e+07	0.281595	1.54243
C3G	Time (s)	T11	G12+C13	Total	T11, %	G12/C13, %
no RfaH	10	1.20242e+06	452380	3.75072e+07	3.20584	1.20611
	20	2.6944e+06	1.0652e+06	3.54251e+07	7.60589	3.0069
	40	4.04996e+06	1.79737e+06	3.46021e+07	11.7044	5.19441
	80	4.35969e+06	2.69978e+06	3.37064e+07	12.9343	8.00971
	160	2.89927e+06	3.22582e+06	3.02129e+07	9.59614	10.6769
	320	1886050	4.48482e+06	3.50936e+07	5.37434	12.7796
	640	990395	4.48621e+06	3.45187e+07	2.86916	12.9965
	1280	545511	3.75319e+06	3.26611e+07	1.67022	11.4913
with RfaH	10	955171	621687	3.22333e+07	2.96331	1.92871
	20	2.2956e+06	1.54341e+06	3.58584e+07	6.40186	4.30419
	40	3.30075e+06	2.34569e+06	3.52275e+07	9.36982	6.65869
	80	3.80891e+06	3.20813e+06	3.62138e+07	10.5178	8.85889
	160	3.02435e+06	4.06116e+06	3.68533e+07	8.20647	11.0198
	320	1.91514e+06	4.77442e+06	3.81616e+07	5.0185	12.5111
	640	993329	4.24476e+06	3.66502e+07	2.7103	11.5818
	1280	539498	3.54883e+06	3.49122e+07	1.5453	10.165
G4C	Time (s)	T11	G12+C13	Total	T11, %	G12/C13, %
no RfaH	10	523641	131936	1.37198e+07	3.81668	0.961646
	20	1.04681e+06	231189	1.31584e+07	7.95542	1.75696
	40	1.07788e+06	301774	1.37793e+07	7.82243	2.19005
	80	611177	352171	1.15952e+07	5.27094	3.0372
	160	236121	348681	1.05259e+07	2.24324	3.3126
	320	127070	311927	9.90598e+06	1.28277	3.14887
	640	69294.6	189227	8.75944e+06	0.791084	2.16026
	1280	55098	148710	8.52837e+06	0.646056	1.74371
with RfaH	10	493307	104889	1.05513e+07	4.67533	0.994092
	20	1.07285e+06	229719	1.09104e+07	9.83328	2.10551
	40	1.25801e+06	298343	1.11889e+07	11.2434	2.66642
	80	771900	357380	1.09215e+07	7.06772	3.27227
	160	373918	367887	1.13191e+07	3.30342	3.25013
	320	184366	323684	1.10449e+07	1.66925	2.93063
	640	112277	251382	1.12285e+07	0.999927	2.23879
	1280	67601.4	167535	9.29467e+06	0.727314	1.80249
G5A	Time (s)	T11	G12+C13	Total	T11, %	G12/C13, %
no RfaH	10	986048	225208	3.2391e+07	3.0442	0.69528
	20	2.47084e+06	526277	3.08019e+07	8.02171	1.70858
	40	3.20719e+06	889962	2.93494e+07	10.9276	3.0323
	80	2365925	1.30161e+06	2.72915e+07	8.6691	4.76929
	160	979942	1.34068e+06	2.51686e+07	3.89351	5.32679
	320	521187	1.38483e+06	3.01957e+07	1.72603	4.58617
	640	340478	988353	3.22362e+07	1.0562	3.06597
	1280	195105	553402	3.06048e+07	0.637498	1.80822
with RfaH	10	1.10283e+06	270359	2.69828e+07	4.08716	1.00197
	20	2.63248e+06	633274	2.92679e+07	8.99443	2.16372
	40	3.42483e+06	1.02517e+06	3.02683e+07	11.3149	3.38695
	80	2.94618e+06	1.32498e+06	3.03408e+07	9.71029	4.36699
	160	1.99567e+06	1.4883e+06	3.14292e+07	6.34973	4.7354
	320	1.06349e+06	1.47106e+06	3.22868e+07	3.2939	4.55623
	640	569890	1.22644e+06	3.43084e+07	1.66108	3.57476
	1280	298001	795630	2.9987e+07	0.993768	2.65325
T6A	Time (s)	T11	G12+C13	Total	T11, %	G12/C13, %
no RfaH	10	1.30448e+06	291680	1.73266e+07	7.52877	1.68342
	20	2.27275e+06	485655	1.89583e+07	13.1171	2.56171
	40	1.86133e+06	630690	1.86921e+07	10.7426	3.37411
	80	1.07084e+06	776611	1.92362e+07	6.1803	4.03724
	160	462661	850712	2.1257e+07	2.67023	4.00204
	320	199421	683482	2.03468e+07	1.15095	3.35917
	640	113699	460312	1.73072e+07	0.656211	2.65966
	1280	79123.4	353048	1.64794e+07	0.456657	2.14236
with RfaH	10	1.24533e+06	594881	1.93219e+07	7.18739	3.07879
	20	1.46234e+06	1.25108e+06	2.1525e+07	8.43986	5.81223
	40	925933	1.37204e+06	2.14544e+07	5.34398	6.39515
	80	445376	1.448e+06	2.3312e+07	2.57047	6.21137
	160	207233	1.32304e+06	2.36219e+07	1.19604	5.60091
	320	134311	1.04346e+06	2.35901e+07	0.775171	4.42331
	640	101689	661304	2.18158e+07	0.586894	3.0313
	1280	70255.2	400370	1.72529e+07	0.405475	2.3206
A7T	Time (s)	T11	G12+C13	Total	T11, %	G12/C13, %
no RfaH	10	395736	317029	2.83167e+07	1.39753	1.11958
	20	1.23464e+06	480383	2.93558e+07	4.20578	1.63641
	40	2.59538e+06	690741	2.91392e+07	8.90684	2.37049
	80	3.624e+06	865962	2.91623e+07	12.427	2.96946
	160	3.28751e+06	1.01481e+06	2.995e+07	10.9767	3.38835
	320	1.76609e+06	1.0586e+06	2.94732e+07	5.99219	3.59176
	640	951727	953701	3.1017e+07	3.06841	3.07477
	1280	583758	658613	2.956e+07	1.97482	2.22805
with RfaH	10	419617	294924	2.64618e+07	1.58574	1.11453
	20	1.42235e+06	500744	3.00011e+07	4.74097	1.66908
	40	3.00327e+06	744860	3.05625e+07	9.82665	2.43717
	80	4.28742e+06	996470	3.06038e+07	14.0094	3.25603
	160	4.02823e+06	1.05748e+06	2.95261e+07	13.6429	3.5815
	320	2.8347e+06	1.31462e+06	3.21282e+07	8.82307	4.09178
	640	1.52424e+06	1.19202e+06	3.22612e+07	4.72468	3.69489
	1280	736931	869790	3.13288e+07	2.35225	2.77632
G8C	Time (s)	T11	G12+C13	Total	T11, %	G12/C13, %
no RfaH	10	2.32699e+06	436536	1.84383e+07	12.6204	2.36755
	20	2.71994e+06	565057	2.01013e+07	13.5311	2.81104
	40	1.87104e+06	533443	1.70043e+07	11.0033	3.1371
	80	1.25721e+06	669012	1.98185e+07	6.34363	3.3757
	160	572684	647444	2.02369e+07	2.8299	3.19933
	320	300940	566639	2.17513e+07	1.38355	2.60508
	640	222663	477096	2.19596e+07	1.01397	2.17261
	1280	151049	361714	2.12385e+07	0.711204	1.70311
with RfaH	10	1.54435e+06	288019	1.40541e+07	10.9886	2.04936
	20	2.38763e+06	535608	1.87884e+07	12.708	2.85073
	40	1.72537e+06	445738	1.52339e+07	11.3259	2.92596
	80	1.38498e+06	593723	1.77098e+07	7.82042	3.35251
	160	795024	617970	1.87675e+07	4.23617	3.29276
	320	362578	519722	1.6776e+07	2.1613	3.09802
	640	248955	502931	1.98934e+07	1.25145	2.52814
	1280	155790	387081	1.91524e+07	0.813425	2.02106
C9G	Time (s)	T11	G12+C13	Total	T11, %	G12/C13, %
no RfaH	10	1.47679e+06	715135	1.68119e+07	8.7842	4.25376
	20	839803	605418	1.93217e+07	4.34642	3.13336
	40	445767	525787	1.94401e+07	2.29303	2.70465
	80	251127	471820	1.82295e+07	1.37759	2.58823
	160	185106	445624	1.97364e+07	0.937893	2.25788
	320	146920	355271	1.96837e+07	0.746407	1.8049
	640	134153	283889	1.9744e+07	0.679464	1.43785
	1280	115506	210322	1.9895e+07	0.580577	1.05716
with RfaH	10	311594	1.16445e+06	1.69516e+07	1.83814	6.86929
	20	139994	1.01061e+06	1.96626e+07	0.711981	5.13976
	40	114635	899786	1.94532e+07	0.589285	4.62538
	80	139149	843082	2.01917e+07	0.689139	4.17539
	160	132608	685167	1.88875e+07	0.702095	3.62762
	320	147079	601852	2.05692e+07	0.715043	2.92598
	640	161551	444628	2.21846e+07	0.728212	2.00422
	1280	131492	266152	1.80103e+07	0.730094	1.47778
G10C	Time (s)	T11	G12+C13	Total	T11, %	G12/C13, %
no RfaH	10	1.89529e+06	484425	2.25669e+07	8.39853	2.14661
	20	2.97919e+06	755611	2.12326e+07	14.0312	3.55873
	40	2.81041e+06	1.17337e+06	2.19892e+07	12.7809	5.33613
	80	1.66649e+06	1.52782e+06	2.42365e+07	6.87597	6.3038
	160	718883	1.65379e+06	2.76803e+07	2.59709	5.97461
	320	309818	1.33173e+06	2.6904e+07	1.15157	4.94994
	640	195947	953526	2.72973e+07	0.717827	3.49312
	1280	130169	657870	2.48993e+07	0.522782	2.64213
with RfaH	10	1.56781e+06	818290	2.26275e+07	6.92876	3.61635
	20	2.22969e+06	1.80596e+06	2.76827e+07	8.05445	6.5238
	40	1.56187e+06	2.37225e+06	2.71135e+07	5.76051	8.74933
	80	741462	2.49512e+06	2.80571e+07	2.64269	8.89301
	160	358152	2.29344e+06	2.79395e+07	1.28188	8.2086
	320	214899	1.77517e+06	2.64268e+07	0.813187	6.71732
	640	145346	1.27694e+06	2.62252e+07	0.554221	4.86912
	1280	107959	726589	2.15965e+07	0.49989	3.36438
T11G	Time (s)	T11	G12+C13	Total	T11, %	G12/C13, %
no RfaH	10	216092	98107.1	2.24528e+07	0.962427	0.436948
	20	468103	268950	2.24769e+07	2.0826	1.19656
	40	756392	496903	2.2704e+07	3.33154	2.18861
	80	803025	627617	2.28382e+07	3.51615	2.74811
	160	513074	577888	2.30556e+07	2.22538	2.5065
	320	257421	514994	2.26071e+07	1.13867	2.27802
	640	192240	505742	2.40251e+07	0.800164	2.10506
	1280	123794	430833	2.10231e+07	0.588846	2.04933
with RfaH	10	186386	198477	2.09895e+07	0.887994	0.9456
	20	216164	465946	2.14158e+07	1.00937	2.17572
	40	226389	688935	2.1136e+07	1.07111	3.25953
	80	208744	759662	2.17971e+07	0.957669	3.48515
	160	145414	675279	2.22162e+07	0.654543	3.03958
	320	104533	532676	2.1962e+07	0.475972	2.42545
	640	97602.1	483452	2.23782e+07	0.436149	2.16037
	1280	72256.4	381414	1.85301e+07	0.389942	2.05835
G12C	Time (s)	T11	G12+C13	Total	T11, %	G12/C13, %
no RfaH	10	47934.2	73945.3	1.27591e+07	0.375686	0.579547
	20	76029.7	199746	1.41023e+07	0.539131	1.41641
	40	98257.3	337829	1.46537e+07	0.670531	2.30542
	80	86236.6	414716	1.42002e+07	0.607292	2.9205
	160	66791.8	464650	1.57227e+07	0.42481	2.95527
	320	45640.2	403538	1.48251e+07	0.307859	2.722
	640	36623.9	348059	1.49494e+07	0.244986	2.32825
	1280	31702	284603	1.61666e+07	0.196095	1.76044
with RfaH	10	42818.4	327062	12553108	0.341098	2.60542
	20	59529.5	826983	1.40958e+07	0.42232	5.86686
	40	62547.5	1.32367e+06	1.49481e+07	0.418432	8.85511
	80	54118.5	1.41552e+06	1.50002e+07	0.360785	9.43667
	160	47828.5	1.22181e+06	1.50264e+07	0.318297	8.1311
	320	48653.5	1.07699e+06	1.56628e+07	0.31063	6.8761
	640	53488.5	916071	1.58766e+07	0.336902	5.76995
	1280	44999.7	557438	1.39014e+07	0.323706	4.00994

## Sheet: in vitro 2
In vitro analysis of ops mutants: Trial 2
WT	Time (s)	T11	G12+C13	Total	T11, %	G12/C13, %
no RfaH	20	7.89309e+06	1.22125e+06	6.89106e+07	11.4541	1.77222
	40	6.36152e+06	1.8212e+06	8.38196e+07	7.58954	2.17276
with RfaH	20	2.57407e+06	8.73762e+06	8.47491e+07	3.03729	10.31
	40	1.05259e+06	9.72548e+06	7.92281e+07	1.32856	12.2753
G1C	Time (s)	T11	G12+C13	Total	T11, %	G12/C13, %
no RfaH	10	612649	316750	2.21678e+07	2.7637	1.42888
	20	1.21249e+06	893970	2.74899e+07	4.4107	3.252
	40	698016	810313	2.61734e+07	2.6669	3.09595
	80	209158	520812	2.57275e+07	0.812976	2.02434
	160	96577.1	394429	2.61545e+07	0.369256	1.50807
	320	60275.2	305053	2.36344e+07	0.255032	1.29072
	640	50037.3	291648	2.53372e+07	0.197485	1.15106
	1280	51731.2	315713	3.12433e+07	0.165575	1.0105
with RfaH	10	235521	755551	2.33659e+07	1.00797	3.23356
	20	237135	1.36618e+06	2.39345e+07	0.99077	5.70799
	40	102964	1.22902e+06	2.37956e+07	0.4327	5.1649
	80	38580.2	807359	2.52903e+07	0.152549	3.19236
	160	21033.9	472852	2.6257e+07	0.0801079	1.80086
	320	22905.6	354723	2.75532e+07	0.0831324	1.28741
	640	24280	315510	3.12256e+07	0.0777567	1.01042
	1280	21805.8	249528	2.37843e+07	0.0916815	1.04913
G2C	Time (s)	T11	G12+C13	Total	T11, %	G12/C13, %
no RfaH	10	586015	181626	2.43113e+07	2.41047	0.747086
	20	1.5557e+06	372531	2.37347e+07	6.55454	1.56957
	40	2.20232e+06	485584	2.37123e+07	9.28766	2.04781
	80	1.64082e+06	537787	2.27626e+07	7.2084	2.36259
	160	709884	515516	2.27436e+07	3.12125	2.26664
	320	344890	458842	2.56174e+07	1.34631	1.79113
	640	203142	335841	2.27558e+07	0.892703	1.47585
	1280	150503	266185	2.26567e+07	0.664278	1.17486
with RfaH	10	192960	282133	2.05379e+07	0.939531	1.37372
	20	304514	619199	2.19559e+07	1.38694	2.82019
	40	313963	876926	2.42133e+07	1.29666	3.62167
	80	226100	907618	2.39217e+07	0.945168	3.79412
	160	147141	853533	2.34498e+07	0.627473	3.63983
	320	97024.4	717907	2.22e+07	0.437048	3.23382
	640	77351.9	540769	2.15454e+07	0.359019	2.50991
	1280	59019.4	347064	1.86244e+07	0.316893	1.86349
C3G	Time (s)	T11	G12+C13	Total	T11, %	G12/C13, %
no RfaH	10	1.50304e+06	555995	2.96902e+07	5.06241	1.87266
	20	3.12802e+06	1.25695e+06	2.85277e+07	10.9648	4.40606
	40	4.44667e+06	2.05977e+06	2.93517e+07	15.1496	7.01755
	80	4.21013e+06	2.72769e+06	2.8147e+07	14.9577	9.69089
	160	2.99873e+06	3.72119e+06	2.91678e+07	10.281	12.7579
	320	1.63348e+06	4.1852e+06	2.92936e+07	5.57624	14.2871
	640	834286	4.13607e+06	2.92519e+07	2.85208	14.1395
	1280	449502	3.59201e+06	2.86385e+07	1.56957	12.5426
with RfaH	10	1.3112e+06	754348	2.8104e+07	4.66552	2.68413
	20	2.45344e+06	1.65737e+06	2.7852e+07	8.80883	5.95062
	40	3.51032e+06	2.57625e+06	3.10015e+07	11.3231	8.31009
	80	3.55746e+06	3.06333e+06	2.97694e+07	11.95	10.2902
	160	2.68367e+06	3.5831e+06	2.92797e+07	9.16564	12.2375
	320	1.47475e+06	4.01554e+06	3.07806e+07	4.79115	13.0457
	640	789008	3.81903e+06	2.96085e+07	2.6648	12.8984
	1280	432597	3.11114e+06	2.6931e+07	1.60631	11.5522
G4C	Time (s)	T11	G12+C13	Total	T11, %	G12/C13, %
no RfaH	10	258180	61018.2	4.67132e+06	5.52692	1.30623
	20	506071	125942	5.06671e+06	9.98815	2.48568
	40	485451	183182	5.17775e+06	9.37573	3.53786
	80	251600	181407	4.94712e+06	5.08579	3.66692
	160	85677.7	166319	5.22635e+06	1.63934	3.18231
	320	44595.7	133684	5.71344e+06	0.780541	2.33981
	640	30767.4	85119.6	5.29276e+06	0.581312	1.60823
	1280	24352.8	63170.7	5.30974e+06	0.458645	1.18972
with RfaH	10	282536	71842.8	5.16958e+06	5.46536	1.38972
	20	519591	132303	4.97351e+06	10.4472	2.66015
	40	540571	192974	5.26236e+06	10.2724	3.66706
	80	299048	178206	4.66144e+06	6.41535	3.82299
	160	145250	166739	4.81835e+06	3.01453	3.4605
	320	62544.4	140729	4.79128e+06	1.30538	2.93719
	640	35080.7	103982	4.67368e+06	0.750601	2.22484
	1280	22077.5	73876.8	4.38741e+06	0.503201	1.68384
G5A	Time (s)	T11	G12+C13	Total	T11, %	G12/C13, %
no RfaH	10	932063	285869	2.63469e+07	3.53765	1.08502
	20	2.06967e+06	507373	2.28153e+07	9.07138	2.22382
	40	3.18653e+06	989536	2.57859e+07	12.3576	3.83751
	80	2.33483e+06	1.34051e+06	2.49289e+07	9.36598	5.37733
	160	1.07038e+06	1.42111e+06	2.52178e+07	4.24452	5.63532
	320	464623	1.19251e+06	2.51378e+07	1.8483	4.74389
	640	310998	882405	2.54043e+07	1.22419	3.47345
	1280	200405	520844	2.26891e+07	0.883264	2.29557
with RfaH	10	762391	189398	2.07129e+07	3.68075	0.914397
	20	2.14128e+06	570490	2.40493e+07	8.9037	2.37217
	40	3.12523e+06	961497	2.49543e+07	12.5238	3.85304
	80	2.51386e+06	1.18653e+06	2.3991e+07	10.4784	4.94572
	160	1.44769e+06	1.14841e+06	2.18443e+07	6.6273	5.25727
	320	825051	1.18963e+06	2.5045e+07	3.29427	4.74995
	640	468525	969507	2.41594e+07	1.93931	4.01296
	1280	315695	763723	2.5387e+07	1.24353	3.00832
T6A	Time (s)	T11	G12+C13	Total	T11, %	G12/C13, %
no RfaH	20	2.46749e+06	613152	1.62333e+07	15.2002	3.77712
	40	2.30965e+06	845551	1.70267e+07	13.5649	4.96604
	80	1.32623e+06	960403	1.69927e+07	7.8047	5.65187
	160	481863	713481	1.40818e+07	3.4219	5.0667
with RfaH	20	1.92083e+06	1.28812e+06	1.74978e+07	10.9776	7.36163
	40	1.38311e+06	1.67258e+06	1.80013e+07	7.68335	9.29141
	80	744426	1.83356e+06	1.89321e+07	3.93209	9.68496
	160	371134	1.58132e+06	1.77868e+07	2.08657	8.89042
A7T	Time (s)	T11	G12+C13	Total	T11, %	G12/C13, %
no RfaH	10	50268.5	14112.3	3.61256e+06	1.39149	0.390646
	20	206581	33894.9	4.04594e+06	5.10588	0.837752
	40	409040	61258.5	4.14699e+06	9.86356	1.47718
	80	567852	88106.3	4.36542e+06	13.008	2.01828
	160	456098	115823	4.19774e+06	10.8653	2.75916
	320	230371	137062	4.38449e+06	5.25423	3.12608
	640	117727	122758	4.47827e+06	2.62886	2.74119
	1280	85282.6	95529.2	4.8889e+06	1.74441	1.954
with RfaH	10	54661.5	15600.3	4.05519e+06	1.34794	0.384699
	20	208917	41233.7	4.27584e+06	4.886	0.964342
	40	422188	72322	4.545e+06	9.28907	1.59124
	80	639919	113638	4.58205e+06	13.9658	2.48008
	160	427420	224864	4.83998e+06	8.83104	4.64598
	320	379629	178088	4.79462e+06	7.91781	3.71432
	640	131048	105403	3.76774e+06	3.47817	2.79752
	1280	75085.2	97894.8	3.98469e+06	1.88434	2.45677
G8C	Time (s)	T11	G12+C13	Total	T11, %	G12/C13, %
no RfaH	10	5.06914e+06	864275	3.38565e+07	14.9724	2.55276
	20	6.91025e+06	1.37476e+06	3.6265e+07	19.0549	3.79086
	40	6.9747e+06	1.47459e+06	3.66547e+07	19.0282	4.02293
	80	5.4517e+06	1.61427e+06	3.87172e+07	14.0808	4.16938
	160	2.6621e+06	1.59415e+06	4.12345e+07	6.45601	3.86607
	320	1.10926e+06	1.40804e+06	4.18718e+07	2.64919	3.36274
	640	628557	1.15651e+06	4.51779e+07	1.39129	2.55991
	1280	437086	896151	4.25773e+07	1.02657	2.10476
with RfaH	10	3.91984e+06	725195	3.21474e+07	12.1933	2.25584
	20	7.04815e+06	1.27488e+06	3.62122e+07	19.4634	3.52059
	40	7.25921e+06	1.57982e+06	3.81114e+07	19.0473	4.14527
	80	5.7114e+06	1.63911e+06	3.92106e+07	14.5659	4.18027
	160	3.52302e+06	1.70512e+06	4.1073e+07	8.57746	4.15144
	320	1.61392e+06	1.6501e+06	4.1646e+07	3.87533	3.9622
	640	770663	1.43487e+06	4.29073e+07	1.79611	3.34411
	1280	443348	285869	3.71091e+07	1.19472	0.770347
C9G	Time (s)	T11	G12+C13	Total	T11, %	G12/C13, %
no RfaH	10	2.04588e+06	909110	2.0186e+07	10.1352	4.50366
	20	1.25168e+06	801665	2.3619e+07	5.29945	3.39415
	40	707995	750456	2.33844e+07	3.02764	3.20922
	80	385164	772484	2.42053e+07	1.59124	3.19138
	160	207206	671526	2.38351e+07	0.869332	2.81738
	320	121424	514524	2.40514e+07	0.504852	2.13927
	640	98453.5	403264	2.44096e+07	0.40334	1.65207
	1280	80113.4	270721	2.10957e+07	0.379761	1.2833
with RfaH	10	400603	1.72622e+06	2.24477e+07	1.7846	7.68996
	20	159446	1.59298e+06	2.4073e+07	0.662344	6.6173
	40	94114.3	1.51133e+06	2.45946e+07	0.382662	6.14496
	80	70620	1.26149e+06	2.32992e+07	0.3031	5.4143
	160	79321.1	1.18228e+06	2.40646e+07	0.329617	4.91295
	320	69982.9	917302	2.44782e+07	0.285899	3.74742
	640	76897.5	612186	2.42435e+07	0.317189	2.52516
	1280	78498.9	333822	2.0304e+07	0.386618	1.64412
G10C	Time (s)	T11	G12+C13	Total	T11, %	G12/C13, %
no RfaH	10	349269	73903.7	3.36554e+06	10.3778	2.19589
	20	620464	142423	3.73281e+06	16.6219	3.81544
	40	449970	152176	3.69112e+06	12.1906	4.12277
	80	212208	166166	3.75661e+06	5.64893	4.4233
	160	100219	198643	4.05023e+06	2.47439	4.90448
	320	46910.2	175215	4.05153e+06	1.15784	4.32468
	640	35082.5	131792	4.15295e+06	0.844762	3.17345
	1280	31927.7	111005	4.45685e+06	0.716374	2.49067
with RfaH	10	365734	176912	3.91508e+06	9.34167	4.51872
	20	439000	362357	4.38699e+06	10.0069	8.25981
	40	260940	415046	4.55905e+06	5.72356	9.10378
	80	111840	423959	4.6651e+06	2.39737	9.0879
	160	53762.2	382084	4.77802e+06	1.1252	7.9967
	320	38243.1	304385	4.83514e+06	0.790942	6.29526
	640	34848.7	209934	4.94097e+06	0.7053	4.24885
	1280	31336	135181	4.70642e+06	0.665813	2.87226
T11G	Time (s)	T11	G12+C13	Total	T11, %	G12/C13, %
no RfaH	10	182534	120076	1.43232e+07	1.27439	0.838334
	20	417631	201523	1.38912e+07	3.00644	1.45072
	40	703031	328223	1.55651e+07	4.51673	2.10872
	80	710522	413578	1.61183e+07	4.40816	2.56589
	160	402575	380928	1.46439e+07	2.74911	2.60128
	320	244907	373986	1.74185e+07	1.40601	2.14706
	640	187643	346900	1.79991e+07	1.04251	1.92732
	1280	148893	327193	1.77077e+07	0.840836	1.84774
with RfaH	10	170930	197958	1.65083e+07	1.03542	1.19914
	20	225911	415172	1.73272e+07	1.3038	2.39608
	40	266165	692180	1.95821e+07	1.35923	3.53476
	80	239344	878691	2.08863e+07	1.14594	4.20702
	160	167647	756802	1.9988e+07	0.83874	3.78628
	320	139541	676924	2.06857e+07	0.674578	3.27242
	640	120424	547519	2.02019e+07	0.596103	2.71024
	1280	128008	506330	2.02922e+07	0.630823	2.49519
G12C	Time (s)	T11	G12+C13	Total	T11, %	G12/C13, %
no RfaH	10	19279	43178.7	6.15444e+06	0.313254	0.701585
	20	33001.8	86892.9	6.53461e+06	0.505031	1.32973
	40	40388	141360	6.58311e+06	0.613509	2.14731
	80	39248.2	171076	6.41801e+06	0.611531	2.66556
	160	32949.2	207087	6.99215e+06	0.471231	2.9617
	320	21690.1	160360	5.71333e+06	0.379639	2.80677
	640	22878.3	162157	6.91117e+06	0.331034	2.3463
	1280	21229.6	135168	7.34343e+06	0.289096	1.84067
with RfaH	10	22035.3	104925	6.31077e+06	0.34917	1.66264
	20	30636.9	297435	6.67351e+06	0.459083	4.45695
	40	33855.6	474243	6.32923e+06	0.534909	7.49291
	80	31371	620282	6.74829e+06	0.464873	9.19168
	160	28056.2	587530	6.97771e+06	0.402083	8.4201
	320	25307.9	478529	6.67177e+06	0.379328	7.17245
	640	25840.6	422280	7.08785e+06	0.364577	5.95781
	1280	26370.6	295310	7.15002e+06	0.368819	4.1302

## Sheet: in vitro 3
In vitro analysis of ops mutants: Trial 3
WT	Time (s)	T11	G12+C13	Total	T11, %	G12/C13, %
no RfaH	20	1.21532e+07	1.99107e+06	9.8233e+07	12.3718	2.02688
	40	7.87183e+06	2.2443e+06	1.05693e+08	7.44781	2.12341
with RfaH	20	2.90083e+06	1.11246e+07	1.04127e+08	2.78587	10.6838
	40	1.02679e+06	9.48996e+06	9.49073e+07	1.08189	9.99918
G1C	Time (s)	T11	G12+C13	Total	T11, %	G12/C13, %
no RfaH	20	146129	89027.2	5.22064e+06	2.79906	1.70529
	40	90501.8	87323.7	5.57576e+06	1.62313	1.56613
	80	40871.6	64934.3	5.82085e+06	0.702159	1.11555
	160	17134.5	48193.9	5143391	0.333135	0.937006
with RfaH	20	49066.3	150343	5.15058e+06	0.952638	2.91895
	40	32578.6	145703	5.91545e+06	0.550738	2.46309
	80	19294.6	99368.6	6.32336e+06	0.305133	1.57145
	160	12666.7	62623.2	5.56815e+06	0.227486	1.12467
G2C	Time (s)	T11	G12+C13	Total	T11, %	G12/C13, %
no RfaH	20	256645	51557.2	5.14227e+06	4.99089	1.00262
	40	321234	73060.8	5.45794e+06	5.88563	1.33861
	80	186423	75470.3	5.6492e+06	3.29999	1.33595
	160	44741.2	56767.1	5.59565e+06	0.799571	1.01449
with RfaH	20	46273	103672	5.13502e+06	0.901126	2.01893
	40	32009.2	111173	5.60134e+06	0.571455	1.98476
	80	10428.5	99980.2	5.59752e+06	0.186305	1.78615
	160	2819.31	85663	5.35591e+06	0.0526392	1.59941
C3G	Time (s)	T11	G12+C13	Total	T11, %	G12/C13, %
no RfaH	20	346661	171132	3.50936e+06	9.87821	4.87646
	40	433888	270513	3.66081e+06	11.8522	7.38943
	80	389873	356476	3.61406e+06	10.7877	9.86358
	160	242745	435535	3.45617e+06	7.02351	12.6017
with RfaH	20	244129	202113	3.3588e+06	7.26834	6.0174
	40	311855	277826	3.42971e+06	9.09275	8.10056
	80	291177	331681	3.48265e+06	8.36079	9.52382
	160	189434	377101	3.51049e+06	5.39623	10.7421
G4C	Time (s)	T11	G12+C13	Total	T11, %	G12/C13, %
no RfaH	20	537872	112001	6.46951e+06	8.31395	1.73121
	40	567560	178957	7.20682e+06	7.87532	2.48316
	80	252919	194593	7.11354e+06	3.55546	2.73552
	160	71623.6	169813	7.00502e+06	1.02246	2.42416
with RfaH	20	569303	134462	6.58756e+06	8.6421	2.04115
	40	635036	217404	7.46103e+06	8.51138	2.91387
	80	399459	215366	7.48662e+06	5.33564	2.87668
	160	173505	195216	7.13114e+06	2.43306	2.73752
G5A	Time (s)	T11	G12+C13	Total	T11, %	G12/C13, %
no RfaH	20	223872	43965.9	3.26205e+06	6.86291	1.3478
	40	259507	81535.8	3.81364e+06	6.80471	2.13801
	80	152139	102910	3.79908e+06	4.00464	2.70883
	160	53133.6	93737.8	3.84032e+06	1.38357	2.44089
with RfaH	20	280171	66304.6	4.76848e+06	5.87547	1.39047
	40	291666	94276.3	4.78969e+06	6.08946	1.96832
	80	209615	109422	4.89661e+06	4.28082	2.23465
	160	100942	109911	4.88086e+06	2.06811	2.25188
T6A	Time (s)	T11	G12+C13	Total	T11, %	G12/C13, %
no RfaH	20	2.06749e+06	613152	1.72333e+07	11.9971	3.55795
	40	1.80965e+06	805551	1.70267e+07	10.6283	4.73111
	80	1.32623e+06	960403	1.69927e+07	7.8047	5.65187
	160	481863	713481	1.40818e+07	3.4219	5.0667
with RfaH	20	1.52083e+06	988125	1.74978e+07	8.69157	5.64713
	40	1.18311e+06	1.37258e+06	1.80013e+07	6.57232	7.62487
	80	744426	1.83356e+06	1.89321e+07	3.93209	9.68496
	160	371134	1.48132e+06	1.77868e+07	2.08657	8.32821
A7T	Time (s)	T11	G12+C13	Total	T11, %	G12/C13, %
no RfaH	20	148971	39249.1	2.81361e+06	5.29467	1.39497
	40	262477	58869.5	2.64934e+06	9.90727	2.22205
	80	343874	79450.6	2.78626e+06	12.3418	2.85152
	160	221831	82903.2	2.56597e+06	8.64511	3.23087
with RfaH	20	159001	40158.2	2.87574e+06	5.52902	1.39644
	40	298496	67244.1	2.97325e+06	10.0394	2.26164
	80	379188	96485.1	2.90616e+06	13.0478	3.32003
	160	300508	97153.7	2.74362e+06	10.953	3.54108
G8C	Time (s)	T11	G12+C13	Total	T11, %	G12/C13, %
no RfaH	20	2.04324e+06	374470	1.13728e+07	17.966	3.29268
	40	1.93227e+06	422906	1.17957e+07	16.3812	3.58526
	80	1.30012e+06	453371	1.14563e+07	11.3485	3.95739
	160	624631	450860	1.13368e+07	5.50974	3.97695
with RfaH	20	1.97051e+06	408092	1.22e+07	16.1518	3.34503
	40	1.9031e+06	396661	1.18578e+07	16.0494	3.34516
	80	1.59416e+06	437755	1.268e+07	12.5722	3.45233
	160	864709	449543	1.12115e+07	7.7127	4.00966
C9G	Time (s)	T11	G12+C13	Total	T11, %	G12/C13, %
no RfaH	20	750539	585616	1.79895e+07	4.1721	3.25532
	40	517305	624424	1.8055e+07	2.86516	3.45845
	80	330728	652062	1.82489e+07	1.81231	3.57315
	160	205451	640164	1.8281e+07	1.12385	3.50181
with RfaH	20	103278	1.14085e+06	1.74504e+07	0.591838	6.53769
	40	81478.6	1.17933e+06	1.8133e+07	0.449338	6.50378
	80	68133.6	1.05364e+06	1.7904e+07	0.380549	5.88495
	160	57123.1	878528	1.61097e+07	0.354589	5.45342
G10C	Time (s)	T11	G12+C13	Total	T11, %	G12/C13, %
no RfaH	20	1.30359e+07	2.61091e+06	7.54937e+07	17.2675	3.45845
	40	1.32273e+07	3.84361e+06	7.99428e+07	16.5459	4.80795
with RfaH	20	1.0399e+07	6.97906e+06	8.29909e+07	12.5303	8.40943
	40	6.79431e+06	8.15639e+06	7.87799e+07	8.62442	10.3534
T11G	Time (s)	T11	G12+C13	Total	T11, %	G12/C13, %
no RfaH	20	257780	154424	1.01781e+07	2.53268	1.51721
	40	417682	247425	1.158e+07	3.60693	2.13666
	80	381231	274805	1.11476e+07	3.41987	2.46516
	160	243264	249490	1.04148e+07	2.33576	2.39554
with RfaH	20	144919	328899	1.15963e+07	1.24969	2.83623
	40	160261	493229	1.26439e+07	1.26749	3.90091
	80	125265	536682	1.24882e+07	1.00307	4.29751
	160	82302.3	449306	1.14106e+07	0.721277	3.93761
G12C	Time (s)	T11	G12+C13	Total	T11, %	G12/C13, %
no RfaH	20	76612	230821	1.27441e+07	0.601158	1.8112
	40	122794	414444	1.60424e+07	0.765434	2.58342
	80	121175	509003	1.55387e+07	0.779825	3.27571
	160	95170.5	550968	1.51497e+07	0.6282	3.63682
with RfaH	20	85224.2	798924	1.50522e+07	0.566192	5.3077
	40	106709	1.47081e+06	1.6906e+07	0.631189	8.69996
	80	99472.6	1.72101e+06	1.63192e+07	0.609544	10.5459
	160	78550.5	1.589e+06	1.5289e+07	0.513771	10.3931
