# Supplementary material for: The universally-conserved transcription factor RfaH is recruited to a hairpin structure of the non-template DNA strand
Source: eLife. 2018 May 9;7:e36349. doi: 10.7554/eLife.36349 (PMC5995543; doi:10.7554/eLife.36349)
Supplement: Figure 4—source data 1. [file elife-36349-fig4-data1.xlsx]

## Sheet: Analysis
# AS	d(1H), start (ppm)	d(1H), end (ppm)	Dd(1H) (ppm)	d(1H), start (ppm)	d(1H), end (ppm)	Dd(1H) (ppm)	Ddnorm (ppm)
1	8.55	8.534	-0.016	120.913	120.835	-0.078	0.0178
2	8.073	8.117	0.044	119.586	119.889	0.303	0.0534237
3	8.287	8.305	0.018	119.738	119.71	-0.028	0.0182165
4	8.456	8.411	-0.045	120.5	120.59	0.09	0.0458912
5	10.063	10.072	0.009	120.536	120.404	-0.132	0.0159762
6	10.086	10.087	0.001	123.342	123.445	0.103	0.0103484
7	9.183	9.202	0.019	124.237	124.012	-0.225	0.0294491
8
9	8.416	8.396	-0.02	125.863	126.46	0.597	0.062961
10
11
12
13	8.2	8.26	0.06	116.516	116.997	0.481	0.0769
14	7.9	8.017	0.117	123.01	123.477	0.467	0.125976
15	8.591	8.513	-0.078	116.603	115.87	-0.733	0.107037
16	7.6		-7.6	119.342		-119.342	14.1487
17
18	8.884		-8.884	117.528		-117.528	14.7327
19	8.136	8.057	-0.079	117.75	118.495	0.745	0.108588
20	7.999		-7.999	117.713		-117.713	14.2319
21	8.865	8.908	0.043	122.064	122.047	-0.017	0.0430336
22	9.085	9.045	-0.04	121.2	121.583	0.383	0.0553795
23	7.661	7.73	0.069	119.111	119.515	0.404	0.0799572
24	7.505		-7.505	117.852		-117.852	13.972
25	7.902	7.867	-0.035	117	116.545	-0.455	0.0574043
26	7.663	7.656	-0.007	120.632	120.718	0.086	0.0110887
27	7.963	7.823	-0.14	125.2	124.906	-0.294	0.143054
28	8.879	8.946	0.067	119.471	119.956	0.485	0.0827118
29	9.53	9.564	0.034	123.828	124.457	0.629	0.0715011
30	9.16	9.119	-0.041	128.973	129.554	0.581	0.0711098
31
32	8.846	8.841	-0.005	121.552	121.806	0.254	0.0258874
33	9.351	9.345	-0.006	120.334	120.353	0.019	0.00629365
34	8.246	8.248	0.002	122.043	122.03	-0.013	0.00238537
35	8.998	9.006	0.008	127.648	127.667	0.019	0.00822253
36	8.584	8.578	-0.006	120.514	120.501	-0.013	0.00613922
37	8.933	8.934	0.001	124.866	124.877	0.011	0.00148661
38	8.719	8.716	-0.003	121.919	121.891	-0.028	0.00410366
39	8.718	8.717	-0.001	129.792	129.775	-0.017	0.00197231
40
41
42	7.833	7.833	0	120.859	120.849	-0.01	0.001
43
44	9.249	9.251	0.002	123.681	123.711	0.03	0.00360555
45	8.584	8.579	-0.005	128.413	128.417	0.004	0.00501597
46	9.154	9.151	-0.003	123.908	123.888	-0.02	0.00360555
47	8.59	8.588	-0.002	120.032	119.992	-0.04	0.00447214
48	9.308	9.304	-0.004	124.335	124.4	0.065	0.00763217
49
50	8.743	8.707	-0.036	127.152	126.994	-0.158	0.0393146
51	8.972	8.926	-0.046	115.362	115.341	-0.021	0.0460479
52
53	9.144	9.017	-0.127	113.44	113.206	-0.234	0.129138
54	7.856	7.834	-0.022	118.023	117.727	-0.296	0.0368803
55	9.147		-9.147	122.819		-122.819	15.3138
56	8.826	8.68	-0.146	125.63	124.881	-0.749	0.164091
57	9.268	9.283	0.015	115.596	115.088	-0.508	0.0529683
58	8.75	8.766	0.016	126.202	125.386	-0.816	0.0831538
59	8.515		-8.515	120.485		-120.485	14.7537
60	8.828	8.844	0.016	120.436	120.537	0.101	0.0189212
61
62	8.779	8.788	0.009	117.792	117.725	-0.067	0.0112201
63	8.141	8.173	0.032	121.016	121.312	0.296	0.0435908
64
65	8.059		-8.059	121.936		-121.936	14.6161
66
67
68	7.432	7.274	-0.158	120.972	121.323	0.351	0.161852
69	7.435	7.285	-0.15	122.037	122.979	0.942	0.177126
70	8.458		-8.458	116.754		-116.754	14.4171
71	7.235		-7.235	117.079		-117.079	13.763
72	7.406		-7.406	118.667		-118.667	13.9881
73
74	8.463		-8.463	109.132		-109.132	13.8102
75	7.768	7.935	0.167	121.15	121.89	0.74	0.182661
76	9.012	9.026	0.014	119.929	120.444	0.515	0.053369
77	7.782		-7.782	111.139		-111.139	13.5675
78	8.914	9.07	0.156	116.581	116.68	0.099	0.156314
79	9.26	9.257	-0.003	122.838	122.869	0.031	0.00431393
80	8.722	8.791	0.069	128.116	128.1	-0.016	0.0690185
81	8.787	8.729	-0.058	121.675	121.5	-0.175	0.0605826
82
83	8.264	8.262	-0.002	123.816	123.822	0.006	0.00208806
84	7.869	7.844	-0.025	113.577	113.522	-0.055	0.0255979
85
86	9.061	9.017	-0.044	127.86	127.727	-0.133	0.0459662
87	8.13	8.128	-0.002	122.917	122.94	0.023	0.00304795
88	9.057	9.033	-0.024	130.5	130.34	-0.16	0.0288444
89
90	9.125	9.116	-0.009	121.698	121.693	-0.005	0.00901388
91	8.976	8.99	0.014	121.631	121.663	0.032	0.0143611
92	7.312	7.314	0.002	116.034	116.059	0.025	0.00320156
93	6.675	6.657	-0.018	118.062	118.01	-0.052	0.0187361
94
95	7.433	7.453	0.02	116.181	116.234	0.053	0.0206903
96	7.683	7.679	-0.004	116.272	116.337	0.065	0.00763217
97	7.746	7.73	-0.016	113.064	113.062	-0.002	0.0160012
98	7.264	7.264	0	115.363	115.332	-0.031	0.0031
99	7.597	7.594	-0.003	122.225	122.231	0.006	0.00305941
100	7.52	7.519	-0.001	125.533	125.511	-0.022	0.00241661
101
102	8.4	8.397	-0.003	120.952	120.902	-0.05	0.00583095
103	8.331	8.324	-0.007	120.956	120.933	-0.023	0.00736817
104	8.066	8.064	-0.002	120.472	120.48	0.008	0.00215407
105	8.217	8.216	-0.001	124.154	124.162	0.008	0.00128062
106	8.437	8.436	-0.001	125.365	125.364	-0.001	0.00100499
107
108	8.433	8.431	-0.002	122.031	122.038	0.007	0.00211896
109	7.9	7.9	0	115.456	115.453	-0.003	0.0003
110
111	8.391	8.389	-0.002	122.112	122.095	-0.017	0.00262488
112
113	7.792	7.797	0.005	108.24	108.251	0.011	0.00511957
114	8.234	8.232	-0.002	119.883	119.888	0.005	0.00206155
115	8.211	8.211	0	120.806	120.808	0.002	0.0002
116	8.148	8.146	-0.002	122.246	122.247	0.001	0.0020025
117	8.314	8.313	-0.001	125.88	125.879	-0.001	0.00100499
118	8.393	8.395	0.002	126.176	126.171	-0.005	0.00206155
119	8.268	8.272	0.004	118.325	118.312	-0.013	0.00420595
120	8.491	8.495	0.004	123.176	123.174	-0.002	0.004005
121	8.662	8.663	0.001	110.35	110.346	-0.004	0.00107703
122
123	8.366	8.371	0.005	118.553	118.524	-0.029	0.00578014
124	8.567	8.568	0.001	122.615	122.584	-0.031	0.0032573
125	8.5	8.503	0.003	109.275	109.273	-0.002	0.00300666
126	8.327	8.349	0.022	120.285	120.448	0.163	0.0273805
127	8.448	8.441	-0.007	118.314	118.289	-0.025	0.00743303
128	7.628	7.633	0.005	119.825	119.85	0.025	0.00559017
129	7.445	7.456	0.011	117.405	117.426	0.021	0.0111987
130	7.583	7.579	-0.004	111.594	111.59	-0.004	0.00401995
131
132	7.223	7.222	-0.001	127.813	127.774	-0.039	0.00402616
133
134	9.706	9.692	-0.014	122.676	122.632	-0.044	0.0146751
135	9.512	9.5	-0.012	116.448	116.463	0.015	0.0120934
136
137	8.028	8.017	-0.011	123.611	123.477	-0.134	0.0173367
138	8.626	8.619	-0.007	119.684	119.598	-0.086	0.0110887
139	8.568	8.555	-0.013	115.766	115.765	-0.001	0.0130004
140	7.788	7.809	0.021	120.056	120.099	0.043	0.0214357
141	7.956	7.969	0.013	119.8	119.828	0.028	0.0132981
142
143	8.158	8.156	-0.002	118.138	118.154	0.016	0.00256125
144	7.755	7.766	0.011	116.322	116.311	-0.011	0.0110549
145	7.948	7.945	-0.003	122.096	121.96	-0.136	0.013927
146	8.448	8.458	0.01	116.328	116.549	0.221	0.0242572
147	7.764	7.824	0.06	117.528	117.554	0.026	0.0600563
148	7.883	7.911	0.028	119.17	119.194	0.024	0.0281027
149	8.269	8.259	-0.01	118.904	118.776	-0.128	0.0162432
150
151
152	8.114	8.114	0	118.656	118.661	0.005	0.0005
153	8.095	8.103	0.008	115.91	115.935	0.025	0.00838153
154	8.105	8.108	0.003	121.635	121.62	-0.015	0.0033541
155	8.301	8.305	0.004	123.892	123.878	-0.014	0.00423792
156
157	8.193	8.194	0.001	114.351	114.369	0.018	0.00205913
158	8.369	8.372	0.003	122.877	122.879	0.002	0.00300666
159	8.286	8.285	-0.001	121.517	121.522	0.005	0.00111803
160	8.137	8.135	-0.002	123.394	123.35	-0.044	0.00483322
161	8.352	8.351	-0.001	123.912	123.875	-0.037	0.00383275
162	8.015	8.015	0	130.245	130.223	-0.022	0.0022
strongly affected		Ddnorm > 0.15 ppm
moderately affected		0.1 ppm < Ddnorm < 0.15 ppm
weakly affected		0.04 ppm < Ddnorm < 0.1 ppm
